# Supplementary material for: Effect of a synthetic hydroxyapatite-based bone grafting material compared to established bone substitute materials on regeneration of critical-size bone defects in the ovine scapula
Source: Oxford University Press journal article supplement (doi:10.1093/rb/rbae041), 2024-01-01
Supplement: rbae041_supplementary_data.pdf [file rbae041_supplementary_data.pdf]

891

| <b>Supplementary Table 1: Summary of the main bands noted by the FTIR analysis.</b> |                            |                               |
|-------------------------------------------------------------------------------------|----------------------------|-------------------------------|
| Values                                                                              | Vibration                  | Group                         |
| 941, 943, 945, 960, 962, 967, 969                                                   | v1, symmetrical stretching | P-O                           |
|                                                                                     | v2, stretching             | P-O                           |
| 1002, 1007, 1012, 1021, 1087, 1116                                                  | v3, stretching             | P-O                           |
| 542, 543, 558, 561, 564, 589, 598, 601                                              | v4, wagging                | P-O-P                         |
| 872                                                                                 | v3, Type B substitution    | CO <sub>3</sub> <sup>2-</sup> |
| 628                                                                                 | vL, stretching             | OH <sup>-</sup>               |

892

893

894

895

896

897

898

899

900

901

902

903

904

905

906

907

908

909

910

911

912

913

914

915

**SUPPLEMENTARY TABLE 2: RESULTS OF THE IMMUNOHISTOCHEMICAL ANALYSIS AND SCORING OF OSTEOGENIC MARKER EXPRESSION OF OSTEOCALCIN**

| <b>INTERVAL</b>  | <b>Bone graft material</b> | <b>Osteoblast, Mean ± SD</b> | <b>Osteocyte, Mean ± SD</b> | <b>Fibroblastic cells, Mean ± SD</b> | <b>Fibrous matrix, Mean ± SD</b> | <b>Bone matrix, Mean ± SD</b> | <b>Osteoid, Mean ± SD</b> |
|------------------|----------------------------|------------------------------|-----------------------------|--------------------------------------|----------------------------------|-------------------------------|---------------------------|
| <b>2 WEEKS</b>   | Control                    | 0.00 ± 0.00                  | 0.00 ± 0.00                 | 1.0 ± 0.82                           | 2.50 ± 0.58                      | 0.00 ± 0.00                   | 0.00 ± 0.00               |
|                  | Bio-Oss®                   | 0.00 ± 0.00                  | 0.00 ± 0.00                 | 1.75 ± 1.50                          | 2.25 ± 1.50                      | 0.00 ± 0.00                   | 0.00 ± 0.00               |
|                  | Cerasorb® M                | 0.00 ± 0.00                  | 0.00 ± 0.00                 | 3.25 ± 0.50                          | 3.25 ± 0.50                      | 0.00 ± 0.00                   | 0.00 ± 0.00               |
|                  | Osbone®                    | 0.00 ± 0.00                  | 0.00 ± 0.00                 | 2.50 ± 0.58                          | 2.25 ± 0.50                      | 0.00 ± 0.00                   | 0.00 ± 0.00               |
| <b>1 MONTH</b>   | Control                    | 0.00 ± 0.00                  | 0.75 ± 1.50                 | 2.00 ± 1.15                          | 2.50 ± 1.00                      | 0.25 ± 0.50                   | 0.00 ± 0.00               |
|                  | Bio-Oss®                   | 0.00 ± 0.00                  | 2.25 ± 1.50                 | 3.00 ± 0.00                          | 3.75 ± 0.50                      | 2.75 ± 1.89                   | 0.00 ± 0.00               |
|                  | Cerasorb® M                | 0.00 ± 0.00                  | 3.75 ± 0.50                 | 3.00 ± 0.82                          | 4.50 ± 0.58                      | 4.00 ± 0.00                   | 0.25 ± 0.50               |
|                  | Osbone®                    | 0.00 ± 0.00                  | 3.75 ± 0.50                 | 3.25 ± 0.50                          | 3.50 ± 0.58                      | 4.00 ± 0.00                   | 0.25 ± 0.50               |
| <b>3 MONTHS</b>  | Control                    | 1.00 ± 1.41                  | 2.25 ± 1.50                 | 3.00 ± 0.00                          | 3.25 ± 0.50                      | 1.75 ± 1.50                   | 0.50 ± 0.58               |
|                  | Bio-Oss®                   | 0.50 ± 0.58                  | 3.00 ± 0.00                 | 3.25 ± 0.50                          | 3.50 ± 0.58                      | 3.75 ± 0.50                   | 1.00 ± 0.00               |
|                  | Cerasorb® M                | 0.75 ± 0.50                  | 3.25 ± 0.50                 | 2.75 ± 1.26                          | 3.50 ± 0.58                      | 3.75 ± 0.50                   | 0.50 ± 0.58               |
|                  | Osbone®                    | 0.75 ± 0.50                  | 3.25 ± 0.50                 | 2.75 ± 1.26                          | 3.25 ± 0.50                      | 3.50 ± 0.58                   | 0.50 ± 0.58               |
| <b>6 MONTHS</b>  | Control                    | 0.75 ± 0.96                  | 0.50 ± 1.00                 | 3.00 ± 0.00                          | 3.25 ± 0.50                      | 3.25 ± 0.05                   | 1.25 ± 1.26               |
|                  | Bio-Oss®                   | 0.25 ± 0.50                  | 4.00 ± 0.00                 | 3.50 ± 0.58                          | 3.25 ± 0.50                      | 3.25 ± 0.05                   | 0.50 ± 0.58               |
|                  | Cerasorb® M                | 0.50 ± 0.58                  | 3.25 ± 0.5                  | 3.50 ± 0.58                          | 3.75 ± 0.5                       | 4.25 ± 0.50                   | 0.50 ± 0.58               |
|                  | Osbone®                    | 0.50 ± 0.58                  | 3.00 ± 0.00                 | 2.50 ± 1.00                          | 3.25 ± 0.50                      | 3.75 ± 0.50                   | 0.50 ± 1.00               |
| <b>12 MONTHS</b> | Control                    | 0.50 ± 0.58                  | 1.00 ± 0.82                 | 4.00 ± 0.8                           | 3.25 ± 0.50                      | 3.75 ± 0.50                   | 0.75 ± 0.96               |
|                  | Bio-Oss®                   | 0.50 ± 0.58                  | 3.00 ± 0.00                 | 3.00 ± 0.00                          | 3.25 ± 0.50                      | 3.75 ± 0.50                   | 0.50 ± 0.58               |

**18 MONTHS**

|             |                 |                 |                 |                 |                 |                 |
|-------------|-----------------|-----------------|-----------------|-----------------|-----------------|-----------------|
| Cerasorb® M | $0.75 \pm 1.50$ | $3.00 \pm 0.00$ | $2.50 \pm 1.00$ | $3.50 \pm 0.58$ | $4.00 \pm 0.82$ | $0.75 \pm 1.50$ |
| Osbone®     | $1.25 \pm 1.26$ | $3.00 \pm 0.00$ | $2.50 \pm 1.00$ | $3.25 \pm 0.50$ | $3.75 \pm 0.50$ | $0.50 \pm 1.00$ |
| Control     | $1.75 \pm 0.50$ | $2.50 \pm 1.29$ | $2.75 \pm 0.50$ | $2.75 \pm 0.50$ | $2.75 \pm 0.50$ | $0.50 \pm 0.58$ |
| Bio-Oss®    | $1.00 \pm 0.00$ | $3.50 \pm 0.58$ | $3.00 \pm 0.00$ | $2.50 \pm 1.00$ | $3.50 \pm 0.58$ | $1.50 \pm 1.00$ |
| Cerasorb® M | $0.75 \pm 1.50$ | $3.25 \pm 0.50$ | $3.75 \pm 0.50$ | $4.00 \pm 0.00$ | $4.00 \pm 0.00$ | $0.25 \pm 0.50$ |
| Osbone®     | $0.75 \pm 1.50$ | $3.00 \pm 0.00$ | $3.50 \pm 0.58$ | $3.75 \pm 0.50$ | $3.75 \pm 0.50$ | $0.25 \pm 0.50$ |

916

917

918

**SUPPLEMENTARY TABLE 3: RESULTS OF THE IMMUNOHISTOCHEMICAL ANALYSIS AND SCORING OF OSTEOGENIC MARKER EXPRESSION OF ALKALINE PHOSPHATASE**

| <b>INTERVAL</b>  | <b>Bone graft material</b> | <b>Osteoblast, Mean ± SD</b> | <b>Osteocyte, Mean ± SD</b> | <b>Fibroblastic cells, Mean ± SD</b> | <b>Fibrous matrix, Mean ± SD</b> | <b>Bone matrix, Mean ± SD</b> | <b>Osteoid, Mean ± SD</b> |
|------------------|----------------------------|------------------------------|-----------------------------|--------------------------------------|----------------------------------|-------------------------------|---------------------------|
| <b>2 WEEKS</b>   | Control                    | 0.00 ± 0.00                  | 0.00 ± 0.00                 | 1.25 ± 0.50                          | 2.75 ± 0.50                      | 0.00 ± 0.00                   | 0.00 ± 0.00               |
|                  | Bio-Oss®                   | 0.00 ± 0.00                  | 0.00 ± 0.00                 | 2.00 ± 1.15                          | 2.00 ± 1.15                      | 0.00 ± 0.00                   | 0.00 ± 0.00               |
|                  | Cerasorb® M                | 0.00 ± 0.00                  | 0.00 ± 0.00                 | 3.75 ± 0.50                          | 3.50 ± 0.58                      | 0.00 ± 0.00                   | 0.00 ± 0.00               |
|                  | Osbone®                    | 0.00 ± 0.00                  | 0.00 ± 0.00                 | 2.75 ± 0.50                          | 3.00 ± 0.00                      | 0.00 ± 0.00                   | 0.00 ± 0.00               |
| <b>1 MONTH</b>   | Control                    | 0.00 ± 0.00                  | 1.75 ± 1.50                 | 2.75 ± 0.50                          | 3.00 ± 0.00                      | 1.75 ± 1.50                   | 0.25 ± 0.50               |
|                  | Bio-Oss®                   | 0.25 ± 0.50                  | 2.25 ± 1.50                 | 3.00 ± 0.00                          | 3.75 ± 0.05                      | 2.25 ± 1.50                   | 0.25 ± 0.50               |
|                  | Cerasorb® M                | 0.25 ± 0.50                  | 3.25 ± 0.50                 | 3.25 ± 0.50                          | 4.25 ± 0.50                      | 4.00 ± 0.00                   | 0.50 ± 1.00               |
|                  | Osbone®                    | 0.25 ± 0.50                  | 3.00 ± 0.00                 | 3.00 ± 0.00                          | 3.75 ± 0.50                      | 4.00 ± 0.00                   | 0.25 ± 0.50               |
| <b>3 MONTHS</b>  | Control                    | 0.00 ± 0.00                  | 3.00 ± 0.00                 | 2.50 ± 1.00                          | 3.25 ± 0.50                      | 2.50 ± 1.00                   | 0.00 ± 0.00               |
|                  | Bio-Oss®                   | 1.00 ± 1.41                  | 3.00 ± 0.00                 | 3.25 ± 0.50                          | 3.50 ± 0.58                      | 3.25 ± 0.50                   | 0.50 ± 0.58               |
|                  | Cerasorb® M                | 0.50 ± 0.58                  | 3.25 ± 0.50                 | 2.25 ± 0.96                          | 3.25 ± 0.50                      | 3.25 ± 0.50                   | 0.25 ± 0.50               |
|                  | Osbone®                    | 0.50 ± 0.58                  | 3.25 ± 0.50                 | 2.25 ± 0.96                          | 3.00 ± 0.00                      | 3.00 ± 0.00                   | 0.25 ± 0.50               |
| <b>6 MONTHS</b>  | Control                    | 0.25 ± 0.50                  | 3.00 ± 0.00                 | 2.50 ± 0.58                          | 3.00 ± 0.00                      | 2.25 ± 0.96                   | 0.50 ± 0.58               |
|                  | Bio-Oss®                   | 0.50 ± 0.58                  | 3.00 ± 0.00                 | 3.25 ± 0.50                          | 3.75 ± 0.50                      | 3.00 ± 0.00                   | 0.50 ± 0.58               |
|                  | Cerasorb® M                | 0.00 ± 0.00                  | 3.00 ± 0.00                 | 3.00 ± 0.00                          | 3.75 ± 0.50                      | 3.00 ± 0.00                   | 0.00 ± 0.00               |
|                  | Osbone®                    | 0.00 ± 0.00                  | 3.00 ± 0.00                 | 3.00 ± 0.00                          | 3.25 ± 0.50                      | 2.25 ± 0.50                   | 0.00 ± 0.00               |
| <b>12 MONTHS</b> | Control                    | 0.50 ± 0.58                  | 3.25 ± 0.50                 | 2.50 ± 0.58                          | 3.75 ± 0.50                      | 3.75 ± 0.50                   | 0.50 ± 0.58               |

**18 MONTHS**

|             |                 |                 |                 |                 |                 |                 |
|-------------|-----------------|-----------------|-----------------|-----------------|-----------------|-----------------|
| Bio-Oss®    | $0.25 \pm 0.05$ | $2.50 \pm 1.00$ | $3.00 \pm 0.00$ | $2.25 \pm 1.50$ | $2.75 \pm 1.26$ | $0.50 \pm 0.58$ |
| Cerasorb® M | $0.00 \pm 0.00$ | $3.00 \pm 0.00$ | $2.75 \pm 0.00$ | $3.25 \pm 0.50$ | $2.25 \pm 0.50$ | $0.00 \pm 0.00$ |
| Osbone®     | $0.00 \pm 0.00$ | $3.25 \pm 0.50$ | $2.75 \pm 0.50$ | $3.25 \pm 0.50$ | $2.25 \pm 0.50$ | $0.00 \pm 0.00$ |
| Control     | $0.50 \pm 0.58$ | $3.25 \pm 0.50$ | $3.25 \pm 0.50$ | $2.75 \pm 0.50$ | $3.75 \pm 0.50$ | $0.25 \pm 0.50$ |
| Bio-Oss®    | $0.25 \pm 0.50$ | $3.25 \pm 0.50$ | $3.00 \pm 0.00$ | $3.25 \pm 0.50$ | $2.50 \pm 1.00$ | $0.25 \pm 0.50$ |
| Cerasorb® M | $0.75 \pm 0.50$ | $3.00 \pm 0.00$ | $3.25 \pm 0.50$ | $3.25 \pm 0.50$ | $3.00 \pm 0.82$ | $0.00 \pm 0.00$ |
| Osbone®     | $0.00 \pm 0.00$ | $3.00 \pm 0.00$ | $2.75 \pm 0.50$ | $3.25 \pm 0.50$ | $3.25 \pm 0.50$ | $0.00 \pm 0.00$ |

919

920

**SUPPLEMENTARY TABLE 4: RESULTS OF THE IMMUNOHISTOCHEMICAL ANALYSIS AND SCORING OF OSTEOGENIC MARKER EXPRESSION OF TYPE I COLLAGEN**

| <b>INTERVAL</b>  | <b>Bone graft material</b> | <b>Osteoblast, Mean ± SD</b> | <b>Osteocyte, Mean ± SD</b> | <b>Fibroblastic cells, Mean ± SD</b> | <b>Fibrous matrix, Mean ± SD</b> | <b>Bone matrix, Mean ± SD</b> | <b>Osteoid, Mean ± SD</b> |
|------------------|----------------------------|------------------------------|-----------------------------|--------------------------------------|----------------------------------|-------------------------------|---------------------------|
| <b>2 WEEKS</b>   | Control                    | 0.00 ± 0.00                  | 0.00 ± 0.00                 | 1.50 ± 0.58                          | 2.50 ± 0.58                      | 0.00 ± 0.00                   | 0.00 ± 0.00               |
|                  | Bio-Oss®                   | 0.00 ± 0.00                  | 0.00 ± 0.00                 | 2.00 ± 1.15                          | 2.75 ± 0.50                      | 0.00 ± 0.00                   | 0.00 ± 0.00               |
|                  | Cerasorb® M                | 0.00 ± 0.00                  | 0.00 ± 0.00                 | 4.00 ± 0.00                          | 4.50 ± 0.58                      | 0.00 ± 0.00                   | 0.00 ± 0.00               |
|                  | Osbone®                    | 0.00 ± 0.00                  | 0.00 ± 0.00                 | 3.00 ± 0.00                          | 3.50 ± 0.58                      | 0.00 ± 0.00                   | 0.00 ± 0.00               |
| <b>1 MONTH</b>   | Control                    | 0.00 ± 0.00                  | 1.75 ± 1.50                 | 3.00 ± 0.00                          | 2.75 ± 0.50                      | 1.50 ± 1.00                   | 0.00 ± 0.00               |
|                  | Bio-Oss®                   | 0.25 ± 0.50                  | 3.00 ± 0.00                 | 3.00 ± 0.00                          | 4.00 ± 0.00                      | 3.00 ± 0.00                   | 0.25 ± 0.50               |
|                  | Cerasorb® M                | 0.00 ± 0.00                  | 3.25 ± 0.50                 | 3.00 ± 0.00                          | 4.25 ± 0.50                      | 3.25 ± 0.50                   | 0.25 ± 0.50               |
|                  | Osbone®                    | 0.00 ± 0.00                  | 3.25 ± 0.50                 | 3.00 ± 0.00                          | 3.75 ± 0.50                      | 3.00 ± 0.00                   | 0.25 ± 0.50               |
| <b>3 MONTHS</b>  | Control                    | 0.00 ± 0.00                  | 3.50 ± 0.58                 | 2.50 ± 1.00                          | 3.25 ± 0.50                      | 3.50 ± 0.58                   | 0.00 ± 0.00               |
|                  | Bio-Oss®                   | 1.00 ± 0.00                  | 2.75 ± 0.50                 | 3.00 ± 0.00                          | 3.50 ± 0.58                      | 3.00 ± 0.00                   | 0.75 ± 0.50               |
|                  | Cerasorb® M                | 0.50 ± 0.58                  | 3.00 ± 0.00                 | 3.00 ± 0.00                          | 3.50 ± 0.58                      | 3.25 ± 0.50                   | 1.50 ± 1.73               |
|                  | Osbone®                    | 0.50 ± 0.58                  | 3.00 ± 0.00                 | 3.00 ± 0.00                          | 3.25 ± 0.50                      | 3.25 ± 0.50                   | 1.25 ± 1.26               |
| <b>6 MONTHS</b>  | Control                    | 0.75 ± 0.96                  | 2.50 ± 1.00                 | 2.50 ± 0.58                          | 3.75 ± 0.50                      | 3.50 ± 0.58                   | 0.50 ± 0.58               |
|                  | Bio-Oss®                   | 0.50 ± 0.58                  | 3.00 ± 0.00                 | 3.50 ± 0.58                          | 3.75 ± 0.50                      | 3.25 ± 0.50                   | 1.75 ± 1.50               |
|                  | Cerasorb® M                | 0.00 ± 0.00                  | 3.00 ± 0.00                 | 2.00 ± 1.15                          | 3.75 ± 0.50                      | 3.50 ± 0.58                   | 0.00 ± 0.00               |
|                  | Osbone®                    | 0.00 ± 0.00                  | 2.75 ± 0.50                 | 1.75 ± 1.50                          | 3.75 ± 0.50                      | 3.50 ± 0.58                   | 0.00 ± 0.00               |
| <b>12 MONTHS</b> | Control                    | 0.50 ± 0.58                  | 2.75 ± 0.50                 | 3.00 ± 0.00                          | 3.75 ± 0.50                      | 3.00 ± 0.00                   | 0.50 ± 0.58               |

**18 MONTHS**

|             |                 |                 |                  |                 |                 |                 |
|-------------|-----------------|-----------------|------------------|-----------------|-----------------|-----------------|
| Bio-Oss®    | $0.50 \pm 0.58$ | $3.25 \pm 0.50$ | $3.00 \pm 0.00$  | $3.50 \pm 0.58$ | $4.00 \pm 0.00$ | $0.50 \pm 0.58$ |
| Cerasorb® M | $0.00 \pm 0.00$ | $3.25 \pm 0.50$ | $2.75 \pm 0.50$  | $3.75 \pm 0.50$ | $3.75 \pm 0.50$ | $0.00 \pm 0.00$ |
| Osbone®     | $0.00 \pm 0.00$ | $3.25 \pm 0.50$ | $2.75 \pm 0.50$  | $3.00 \pm 0.00$ | $3.75 \pm 0.50$ | $0.00 \pm 0.00$ |
| Control     | $0.50 \pm 0.58$ | $3.25 \pm 0.50$ | $3.25 \pm 0.50$  | $3.50 \pm 0.58$ | $3.50 \pm 0.58$ | $0.25 \pm 0.50$ |
| Bio-Oss®    | $0.25 \pm 0.50$ | $3.25 \pm 0.50$ | $3.00 \pm 0.00$  | $3.25 \pm 0.50$ | $3.75 \pm 0.50$ | $0.00 \pm 0.00$ |
| Cerasorb® M | $0.00 \pm 0.00$ | $3.50 \pm 0.58$ | $3.875 \pm 0.96$ | $3.00 \pm 1.41$ | $3.25 \pm 0.96$ | $0.00 \pm 0.00$ |
| Osbone®     | $0.00 \pm 0.00$ | $3.00 \pm 0.00$ | $3.75 \pm 0.96$  | $3.25 \pm 0.96$ | $3.25 \pm 0.96$ | $0.00 \pm 0.00$ |

921

922

**SUPPLEMENTARY TABLE 5: RESULTS OF THE IMMUNOHISTOCHEMICAL ANALYSIS AND SCORING OF OSTEOGENIC MARKER EXPRESSION OF BONE SIALOPROTEIN**

| <b>INTERVAL</b>  | <b>Bone graft material</b> | <b>Osteoblast, Mean ± SD</b> | <b>Osteocyte, Mean ± SD</b> | <b>Fibroblastic cells, Mean ± SD</b> | <b>Fibrous matrix, Mean ± SD</b> | <b>Bone matrix, Mean ± SD</b> | <b>Osteoid, Mean ± SD</b> |
|------------------|----------------------------|------------------------------|-----------------------------|--------------------------------------|----------------------------------|-------------------------------|---------------------------|
| <b>2 WEEKS</b>   | Control                    | 0.00 ± 0.00                  | 0.00 ± 0.00                 | 1.50 ± 0.58                          | 2.00 ± 0.00                      | 0.00 ± 0.00                   | 0.00 ± 0.00               |
|                  | Bio-Oss®                   | 0.00 ± 0.00                  | 0.00 ± 0.00                 | 1.50 ± 1.00                          | 2.25 ± 0.96                      | 0.00 ± 0.00                   | 0.00 ± 0.00               |
|                  | Cerasorb® M                | 0.00 ± 0.00                  | 0.00 ± 0.00                 | 2.50 ± 1.00                          | 3.50 ± 0.58                      | 0.00 ± 0.00                   | 0.00 ± 0.00               |
|                  | Osbone®                    | 0.00 ± 0.00                  | 0.00 ± 0.00                 | 1.75 ± 1.26                          | 3.00 ± 0.00                      | 0.00 ± 0.00                   | 0.00 ± 0.00               |
| <b>1 MONTH</b>   | Control                    | 0.00 ± 0.00                  | 2.25 ± 1.50                 | 2.50 ± 1.00                          | 2.75 ± 1.26                      | 1.75 ± 1.50                   | 0.00 ± 0.00               |
|                  | Bio-Oss®                   | 0.25 ± 0.50                  | 3.00 ± 0.00                 | 3.00 ± 0.00                          | 4.00 ± 0.00                      | 3.00 ± 0.00                   | 0.25 ± 0.50               |
|                  | Cerasorb® M                | 0.00 ± 0.00                  | 4.00 ± 0.00                 | 3.75 ± 0.50                          | 4.00 ± 0.00                      | 3.50 ± 1.00                   | 0.25 ± 0.50               |
|                  | Osbone®                    | 0.00 ± 0.00                  | 3.75 ± 0.50                 | 3.50 ± 0.58                          | 4.00 ± 0.00                      | 3.00 ± 0.82                   | 0.30 ± 0.50               |
| <b>3 MONTHS</b>  | Control                    | 0.00 ± 0.00                  | 2.50 ± 1.00                 | 2.00 ± 1.15                          | 3.00 ± 0.00                      | 2.50 ± 1.00                   | 0.00 ± 0.00               |
|                  | Bio-Oss®                   | 0.25 ± 0.50                  | 3.00 ± 0.00                 | 3.50 ± 0.58                          | 4.00 ± 0.00                      | 4.00 ± 0.00                   | 0.25 ± 0.50               |
|                  | Cerasorb® M                | 0.50 ± 0.58                  | 3.75 ± 0.50                 | 3.00 ± 0.00                          | 3.00 ± 0.00                      | 3.75 ± 0.50                   | 0.50 ± 0.58               |
|                  | Osbone®                    | 0.50 ± 0.58                  | 3.50 ± 0.58                 | 3.00 ± 0.00                          | 3.00 ± 0.00                      | 3.25 ± 0.50                   | 0.50 ± 0.58               |
| <b>6 MONTHS</b>  | Control                    | 0.25 ± 0.50                  | 3.00 ± 0.00                 | 2.50 ± 0.58                          | 3.00 ± 0.00                      | 2.75 ± 0.50                   | 0.50 ± 0.58               |
|                  | Bio-Oss®                   | 0.50 ± 0.58                  | 3.00 ± 0.00                 | 3.25 ± 0.05                          | 3.50 ± 0.58                      | 3.00 ± 0.00                   | 1.00 ± 0.00               |
|                  | Cerasorb® M                | 0.50 ± 0.58                  | 3.00 ± 0.00                 | 3.00 ± 0.00                          | 3.75 ± 0.50                      | 3.75 ± 0.50                   | 0.50 ± 0.58               |
|                  | Osbone®                    | 1.25 ± 0.50                  | 3.00 ± 0.00                 | 3.00 ± 0.00                          | 3.50 ± 0.58                      | 3.50 ± 0.58                   | 0.75 ± 0.50               |
| <b>12 MONTHS</b> | Control                    | 0.50 ± 0.58                  | 2.75 ± 0.50                 | 3.00 ± 0.00                          | 3.00 ± 0.00                      | 3.00 ± 0.00                   | 0.50 ± 0.58               |
|                  | Bio-Oss®                   | 0.50 ± 0.58                  | 3.50 ± 0.58                 | 3.25 ± 0.50                          | 3.75 ± 0.50                      | 3.75 ± 0.05                   | 0.50 ± 0.58               |



**18 MONTHS**

|             |             |             |             |             |             |             |
|-------------|-------------|-------------|-------------|-------------|-------------|-------------|
| Cerasorb® M | 0.00 ± 0.00 | 3.25 ± 0.50 | 3.50 ± 0.58 | 3.75 ± 0.50 | 3.50 ± 0.58 | 1.00 ± 1.15 |
| Osbone®     | 0.00 ± 0.00 | 3.25 ± 0.50 | 3.00 ± 0.82 | 3.00 ± 0.82 | 3.00 ± 0.00 | 0.00 ± 0.00 |
| Control     | 0.50 ± 0.58 | 3.00 ± 0.82 | 3.00 ± 0.00 | 3.25 ± 0.50 | 3.00 ± 0.00 | 0.25 ± 0.50 |
| Bio-Oss®    | 0.00 ± 0.00 | 3.50 ± 0.58 | 3.25 ± 0.50 | 3.50 ± 0.58 | 4.00 ± 0.00 | 0.00 ± 0.00 |
| Cerasorb® M | 0.00 ± 0.00 | 3.75 ± 0.50 | 3.00 ± 0.00 | 4.00 ± 0.00 | 3.75 ± 0.50 | 0.00 ± 0.00 |
| Osbone®     | 0.00 ± 0.00 | 3.50 ± 0.58 | 2.75 ± 0.05 | 4.00 ± 0.00 | 3.50 ± 0.58 | 0.00 ± 0.00 |

923
